# Supplementary material
Source: bioRxiv or medRxiv preprint supplement (https://www.biorxiv.org/highwire/filestream/26969/field_highwire_adjunct_files/6/095349-4.pdf)
Supplement: Supplementary file [file 095349-4.pdf]

| Top promoter[SNPs in top promoter]                                  | Linkage                                                                                     | Corrected coexpression score | FDR  |
|---------------------------------------------------------------------|---------------------------------------------------------------------------------------------|------------------------------|------|
| p@chr5:131820136..131820148,- [rs2070727]                           |                                                                                             | 0.68                         | 0.0  |
| enhancer@chr2:61112067-61112568 [rs6545835]                         |                                                                                             | 0.62                         | 0.0  |
| p@chr1:67896878..67896883,+ [rs3762313, rs3762314]                  |                                                                                             | 0.61                         | 0.0  |
| enhancer@chr5:40486540-40486993 [rs7720838]                         |                                                                                             | 0.57                         | 0.0  |
| p4@TAP2 [rs241448, rs241447, rs241452, rs17034, rs241451, rs241449] |                                                                                             | 0.55                         | 0.0  |
| enhancer@chr22:30591785-30593544 [rs713875]                         |                                                                                             | 0.52                         | 0.0  |
| p@chr6:31240851..31240879,- [rs7759127]                             |                                                                                             | 0.52                         | 0.0  |
| p@chr10:35484899..35484906,- [rs1057108]                            |                                                                                             | 0.49                         | 0.0  |
| p@chr17:32635480..32635483,- [rs16969454]                           |                                                                                             | 0.48                         | 0.0  |
| p@chr17:37970009..37970013,- [rs9909593]                            |                                                                                             | 0.46                         | 0.0  |
| enhancer@chr15:67468171-67468380 [rs17294280]                       |                                                                                             | 0.44                         | 0.0  |
| enhancer@chr14:88472465-88473193 [rs8005161]                        |                                                                                             | 0.43                         | 0.0  |
| enhancer@chr10:82253401-82253904 [rs7900536]                        |                                                                                             | 0.41                         | 0.0  |
| p1@DAP3 [rs1058207]                                                 |                                                                                             | 0.41                         | 0.0  |
| p@chr6:32405128..32405175,- [rs3135395]                             |                                                                                             | 0.41                         | 0.01 |
| p1@RPL37 [rs10065570]                                               |                                                                                             | 0.38                         | 0.01 |
| enhancer@chr21:45627966-45628150 [rs2838522]                        |                                                                                             | 0.38                         | 0.01 |
| p@chr14:69261497..69261515,+ [rs2236262]                            |                                                                                             | 0.34                         | 0.02 |
| p@chr2:43521231..43521252,+ [rs1322]                                |                                                                                             | 0.34                         | 0.03 |
| p8@LNPEP [rs2351010]                                                |                                                                                             | 0.32                         | 0.03 |
| p1@C6orf48 [rs9368699]                                              |                                                                                             | 0.32                         | 0.03 |
| enhancer@chr1:206939730-206940044 [rs3024505]                       |                                                                                             | 0.32                         | 0.03 |
| p3@CISD1 [rs2790189]                                                |                                                                                             | 0.31                         | 0.04 |
| p@chr2:102931037..102931044,+ [rs12712135]                          |                                                                                             | 0.29                         | 0.08 |
| p@chr20:62366061..62366072,+ [rs2427533]                            |                                                                                             | 0.28                         | 0.09 |
| p@chr10:64397428..64397447,- [rs16917546, rs10761652]               |                                                                                             | 0.27                         | 0.09 |
| p4@CD244 [rs12036607, rs7410867, rs12036670]                        |                                                                                             | 0.26                         | 0.12 |
| p@chr1:7886661..7886674,+ [rs697693]                                |                                                                                             | 0.23                         | 0.2  |
| p21@SEC16A [rs3812591]                                              | rs3812591:rs3812584 D'=1.0; r <sup>2</sup> =0.38. p3@PMPCA [rs3812584]                      | 0.23                         | 0.2  |
|                                                                     |                                                                                             | 0.17                         | 0.36 |
| p@chr10:81053715..81053725,+ [rs1250560, rs1250559]                 |                                                                                             | 0.23                         | 0.22 |
| enhancer@chr2:43745392-43745589 [rs10189235]                        |                                                                                             | 0.22                         | 0.23 |
| p1@RNU86 [rs12484030]                                               |                                                                                             | 0.22                         | 0.23 |
| p1@AK131570 [rs9252]                                                |                                                                                             | 0.22                         | 0.23 |
| p3@SCAMP3 [rs1046188]                                               |                                                                                             | 0.21                         | 0.25 |
| p@chr3:49360037..49360041,- [rs9873994]                             |                                                                                             | 0.19                         | 0.29 |
| p6@HIPK1 [rs3811019]                                                |                                                                                             | 0.19                         | 0.29 |
| enhancer@chr1:155951073-155951535 [rs1889532]                       |                                                                                             | 0.19                         | 0.29 |
| enhancer@chr6:159514738-159514976 [rs654690]                        |                                                                                             | 0.19                         | 0.31 |
| p@chr6:31543810..31543821,- [rs3093661]                             |                                                                                             | 0.18                         | 0.33 |
| p3@TNXB [rs8283]                                                    |                                                                                             | 0.18                         | 0.34 |
| enhancer@chr6:167411692-167411848 [rs239935]                        |                                                                                             | 0.18                         | 0.34 |
| p1@ENST00000431069 [rs3780373]                                      |                                                                                             | 0.17                         | 0.35 |
| enhancer@chr1:155433776-155433971 [rs12724079]                      |                                                                                             | 0.16                         | 0.38 |
| p7@RBM6 [rs6772095]                                                 |                                                                                             | 0.16                         | 0.41 |
| p2@uc001ff.2 [rs2048431]                                            |                                                                                             | 0.15                         | 0.44 |
| p@chr6:32186154..32186158,- [rs438475]                              |                                                                                             | 0.14                         | 0.46 |
| p@chr1:200877847..200877851,+ [rs7554511]                           |                                                                                             | 0.13                         | 0.54 |
| enhancer@chr6:20811412-20811642 [rs9465900]                         |                                                                                             | 0.12                         | 0.55 |
| p2@ATP2A1 [rs3888190]                                               |                                                                                             | 0.12                         | 0.55 |
| p14@PADS1 [rs174548]                                                |                                                                                             | 0.12                         | 0.55 |
| p1@RBM5 [rs2247510]                                                 |                                                                                             | 0.12                         | 0.55 |
| p3@GON4L [rs3820594]                                                |                                                                                             | 0.1                          | 0.62 |
| chr16:50668341..50668342,+ [rs12913]                                |                                                                                             | 0.09                         | 0.62 |
| enhancer@chr5:158848054-158848257 [rs4921496]                       |                                                                                             | 0.09                         | 0.62 |
| p4@SLC9A4 [rs4851011]                                               |                                                                                             | 0.09                         | 0.63 |
| p1@ZNF300 [rs7724036]                                               |                                                                                             | 0.09                         | 0.63 |
| p@chr5:158705320..158705331,+ [rs12520035]                          |                                                                                             | 0.09                         | 0.64 |
| p13@DGKD [rs838718]                                                 |                                                                                             | 0.08                         | 0.65 |
| p2@TNFRSF6B [rs2297441]                                             | rs2297441:rs11696871 D'=0.96; r <sup>2</sup> =0.61. chr20:62387380..62387381,- [rs11696871] | 0.08                         | 0.68 |
|                                                                     |                                                                                             | 0.01                         | 0.97 |
| p2@NKX2-3 [rs10883371]                                              |                                                                                             | 0.06                         | 0.74 |
| p5@LRRK2 [rs1388597]                                                |                                                                                             | 0.05                         | 0.8  |
| p1@SCARNA5 [rs3792109]                                              |                                                                                             | 0.04                         | 0.86 |
| p@chr3:49570849..49570853,+ [rs1050088]                             | rs1050088:rs3811697 D'=1.0; r <sup>2</sup> =0.32. p@chr3:49591052..49591057,+ [rs3811697]   | 0.03                         | 0.91 |
|                                                                     |                                                                                             | 0.02                         | 0.92 |
| p9@EBF1 [rs7442701]                                                 |                                                                                             | 0.03                         | 0.91 |
| enhancer@chr16:50554457-50554868 [rs12930566]                       |                                                                                             | 0.02                         | 0.92 |
| p1@GTF2H4 [rs2074510]                                               |                                                                                             | 0.02                         | 0.92 |
| p@chr6:134637878..134637882,- [rs6923743]                           |                                                                                             | 0.0                          | 1.0  |

| Cell type                                          | RRA p   | FDR    |
|----------------------------------------------------|---------|--------|
| CD14pos Monocytes                                  | 1.8e-17 | 0      |
| Peripheral Blood Mononuclear Cells                 | 2.8e-14 | 0      |
| CD14 monocytes treated with Trehalose              | 4.7e-14 | 0      |
| CD14 monocytes treated with BCG                    | 7.4e-14 | 0      |
| CD14 monocytes treated with Candida                | 8.2e-14 | 0      |
| CD14 monocytes treated with Group A streptococci   | 9.5e-13 | 0      |
| CD14 monocytes treated with Salmonella             | 9.7e-13 | 0      |
| Basophils                                          | 1.7e-12 | 0      |
| CD14 monocytes treated with IFN Nhexane            | 2e-09   | 0      |
| CD14pos CD16pos Monocytes                          | 2e-09   | 0      |
| CD4 CD25CD45RA memory conventional T cells         | 1.5e-08 | 0      |
| Natural Killer Cells                               | 7.3e-08 | 0      |
| CD4 T Cells                                        | 7.4e-07 | 0      |
| CD14neg CD16pos Monocytes                          | 3.7e-05 | 0      |
| CD14 monocytes treated with lipopolysaccharide     | 8e-12   | 0.0039 |
| CD8 T Cells pluriselect                            | 5.6e-05 | 0.0073 |
| CD34 Progenitors                                   | 1.4e-06 | 0.0087 |
| CD19 B Cells                                       | 1.1e-05 | 0.0087 |
| CD14 monocytes mock treated                        | 3.4e-05 | 0.0087 |
| Dendritic Cells plasmacytoid                       | 0.00069 | 0.0087 |
| CD14 monocytes treated with Bglucan                | 6.6e-08 | 0.011  |
| CD14 monocytes treated with Cryptococcus           | 1e-06   | 0.015  |
| CD4 CD25 CD45RA memory regulatory T cells expanded | 0.0085  | 0.015  |

|                                           |         |       |
|-------------------------------------------|---------|-------|
| CD8 T Cells                               | 3.2e-05 | 0.019 |
| CD14pos CD16neg Monocytes                 | 0.00072 | 0.021 |
| CD4 CD25 CD45RA memory regulatory T cells | 0.0017  | 0.039 |
